# Supplementary material for: Synthesis of several novel coordination complexes: ion exchange, magnetic and photocatalytic studies
Source: Royal Society of Chemistry journal article supplement (doi:10.1039/c6nj02863b), 2016-12-13
Supplement: c6nj02863b1.pdf [file c6nj02863b1.pdf]

## Synthesis of several novel Coordination Complexes: Ion exchange, Magnetic and Photocatalysis Studies

Huijun Li,<sup>a</sup> Yuan Wang,<sup>a</sup> Yaling He,<sup>a</sup> Zhouqing Xu,<sup>a\*</sup> Xiaolei Zhao,<sup>a\*</sup> Yi Han<sup>b\*</sup>

|   |                                                                                                   |   |
|---|---------------------------------------------------------------------------------------------------|---|
| 1 | <b>Figure S1.</b> The powder <b>XRD</b> patterns of <b>1-8</b> and <b>1'-3'</b> .....             | 2 |
| 2 | <b>Figure S2.</b> The UV-vis absorption spectrum of these complexes.....                          | 4 |
| 3 | <b>Figure S3.</b> Kubelka-Munk-transformed diffuse reflectance of these complexes.....            | 5 |
| 4 | <b>Figure S4.</b> The TG curves of complexes <b>1-8</b> .....                                     | 7 |
| 4 | <b>Table S1.</b> Selected Bond Lengths (Å) and Bond Angles (deg) for <b>1-8<sup>a</sup></b> ..... | 8 |

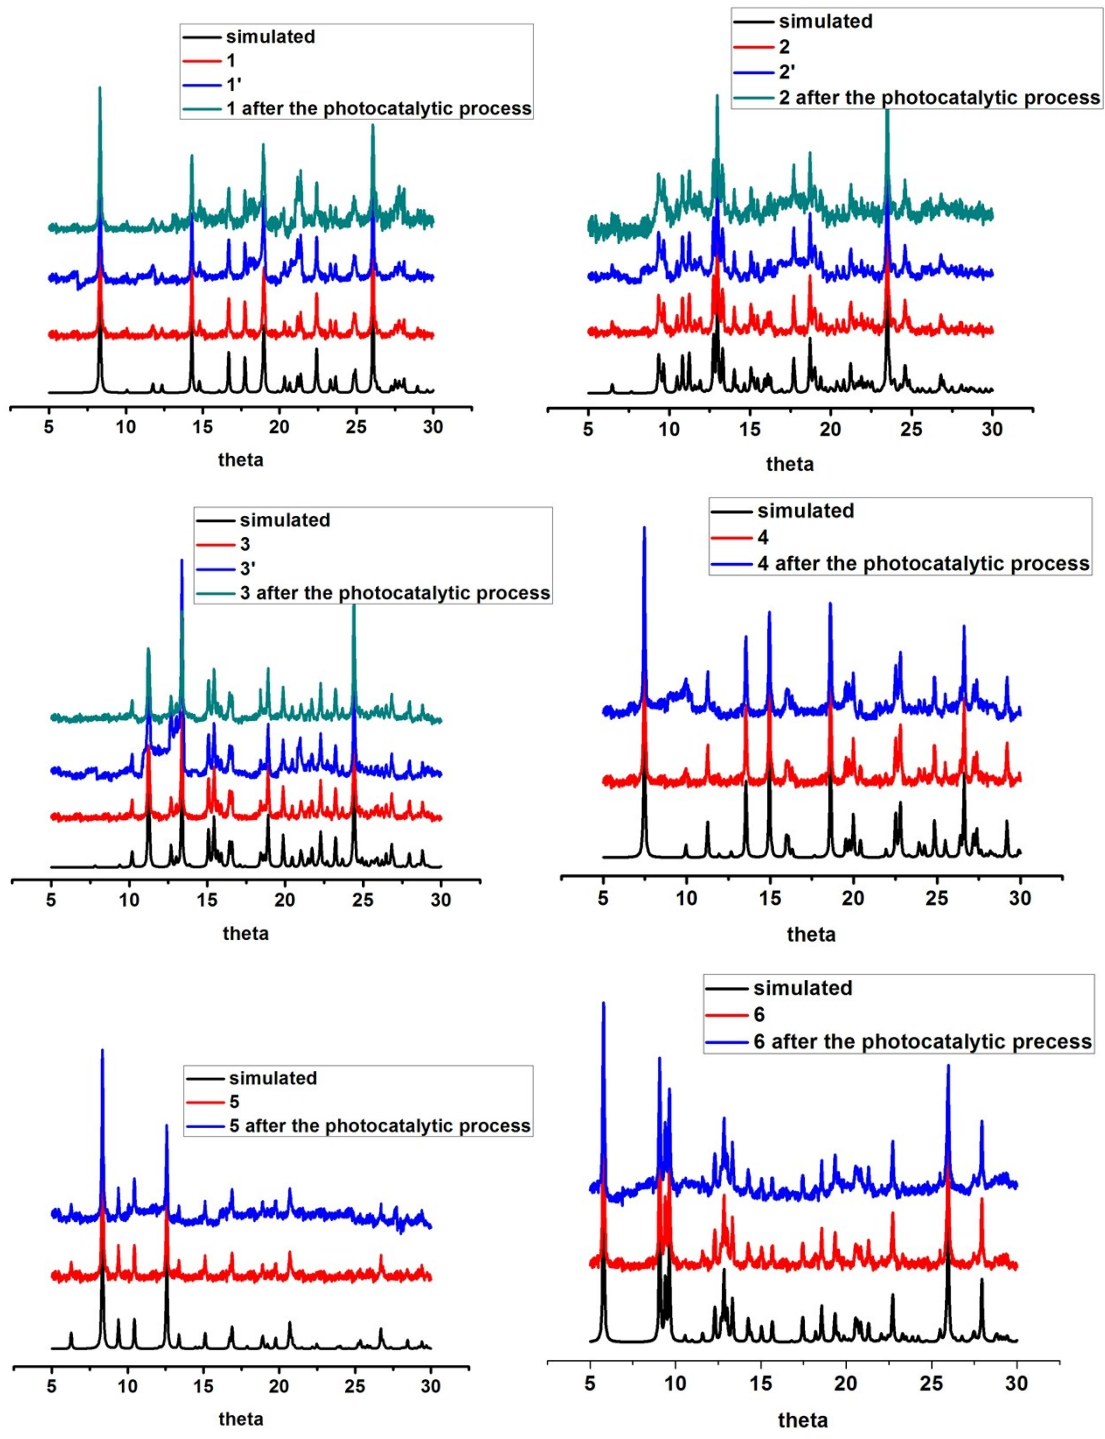

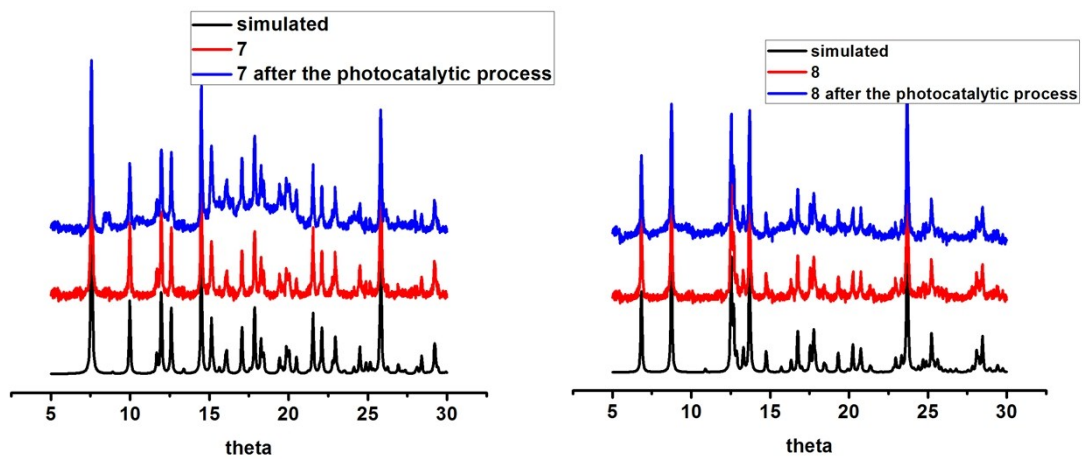

**Figure S1.** The powder XRD patterns of 1-8.

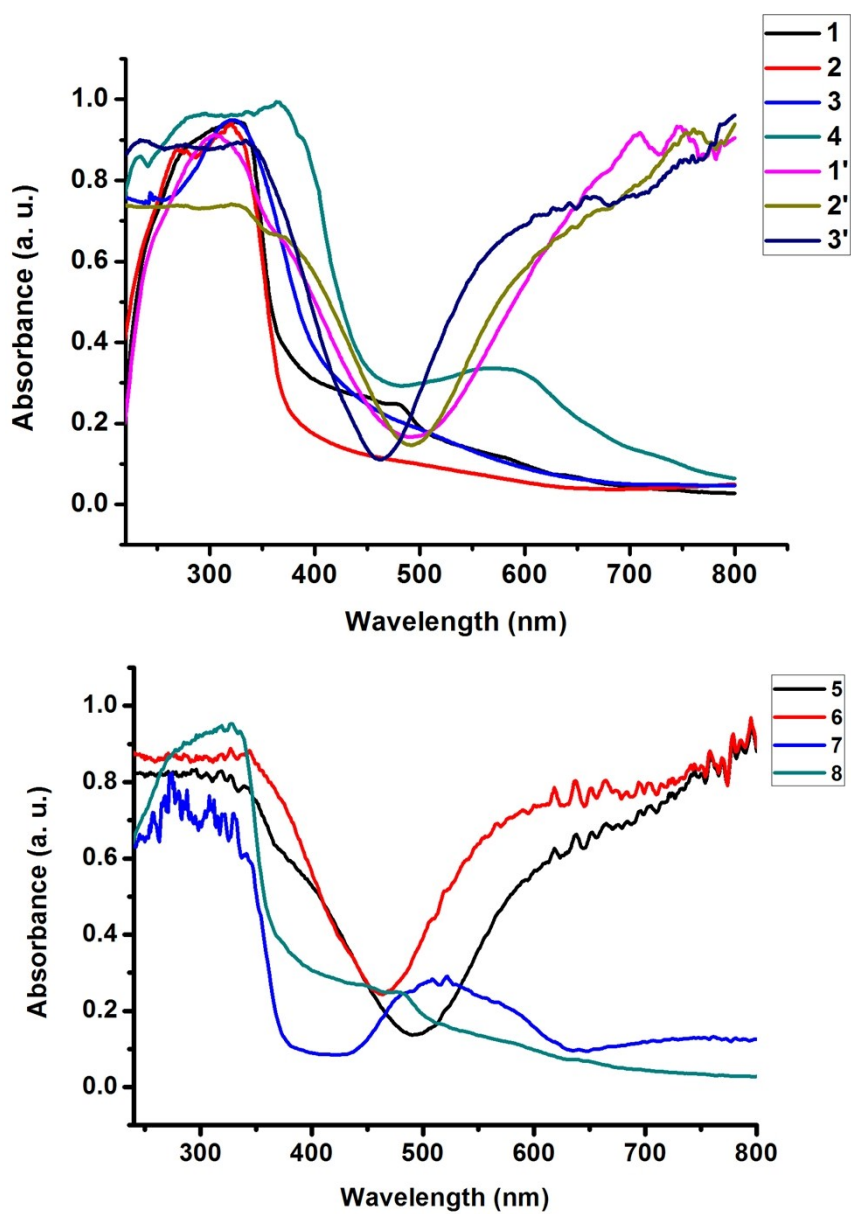

**Figure S2.** The UV-vis absorption spectrum of these complexes.

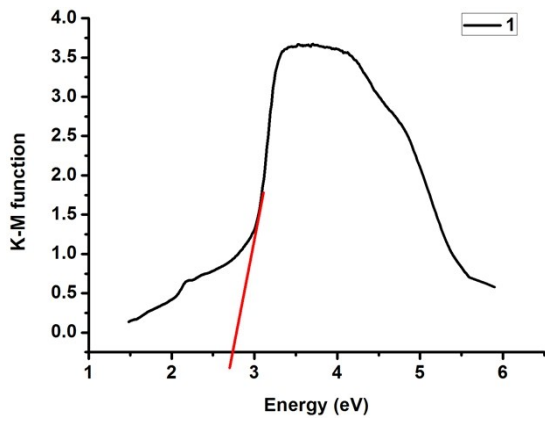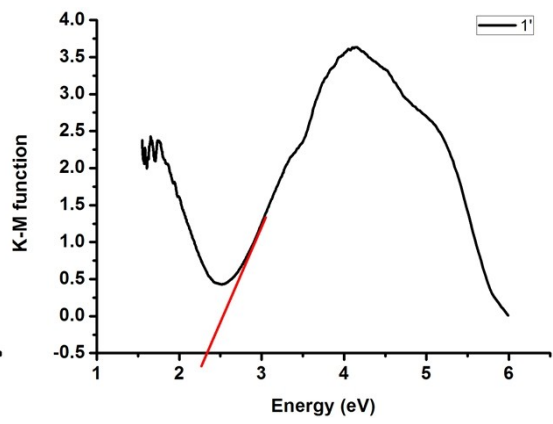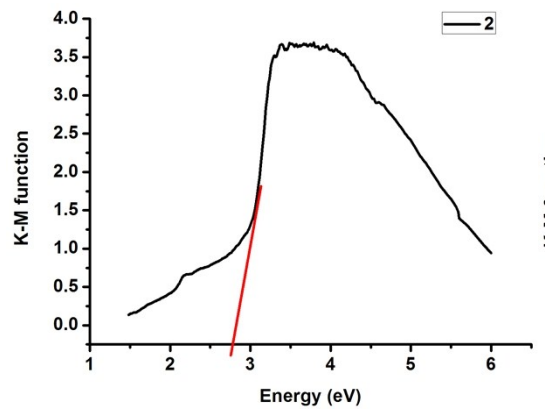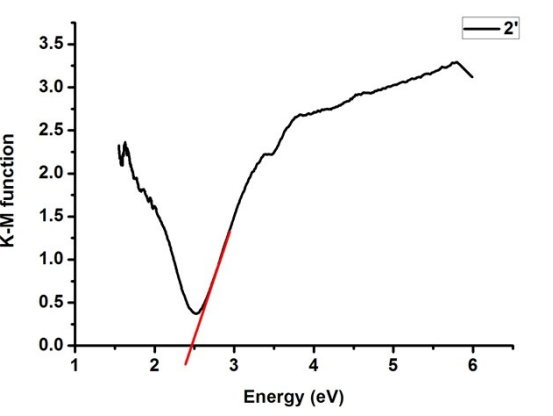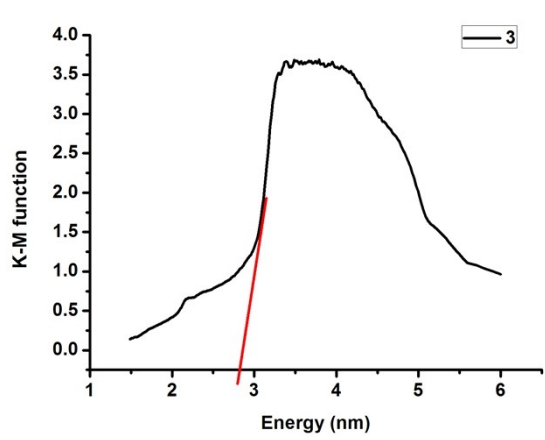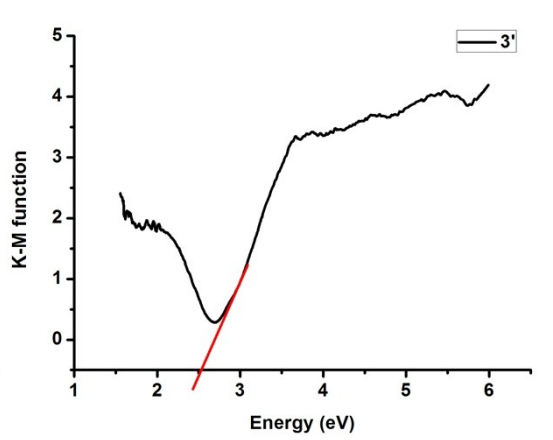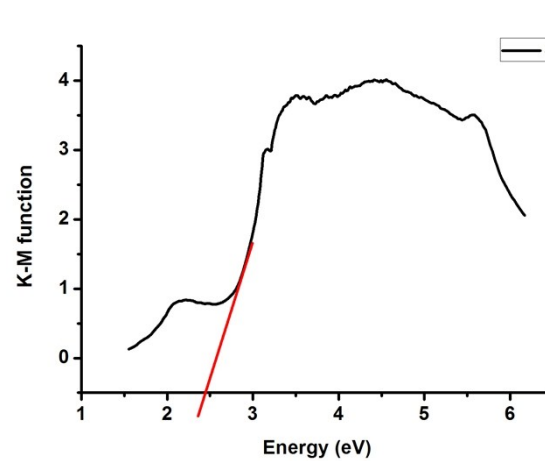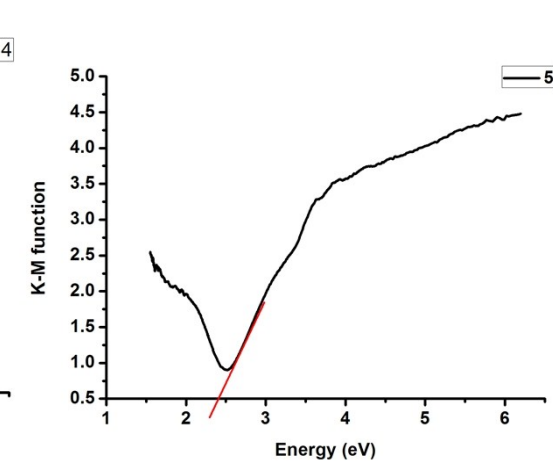

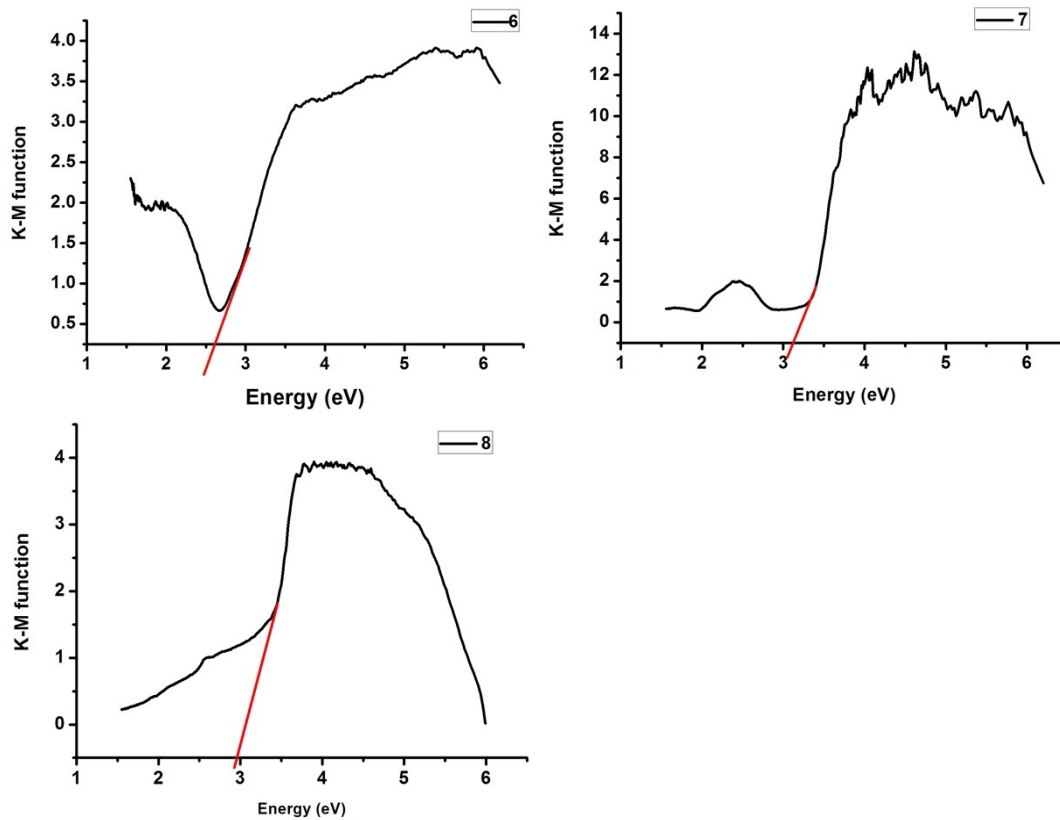

**Figure S3.** Kubelka-Munk-transformed diffuse reflectance of these complexes.

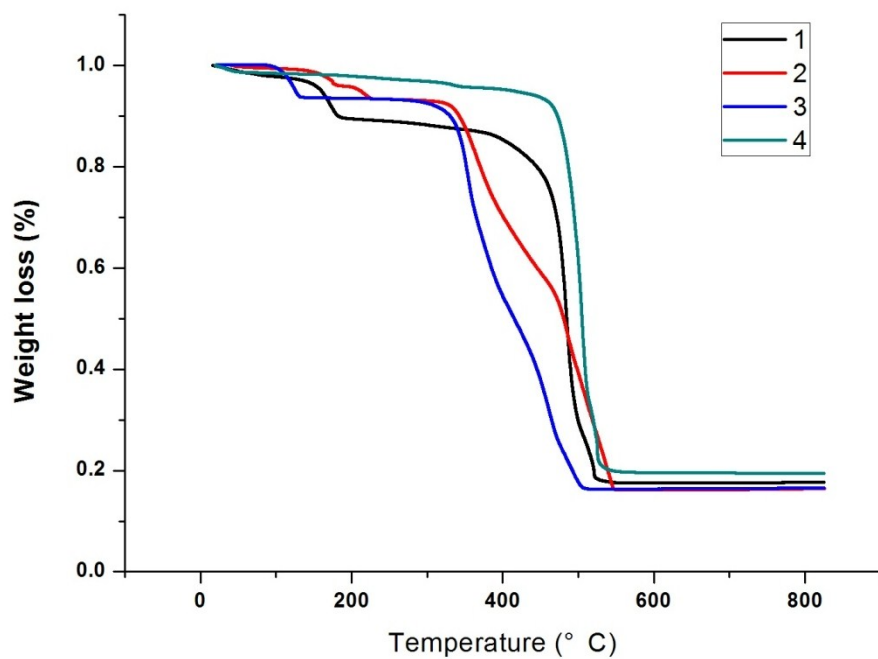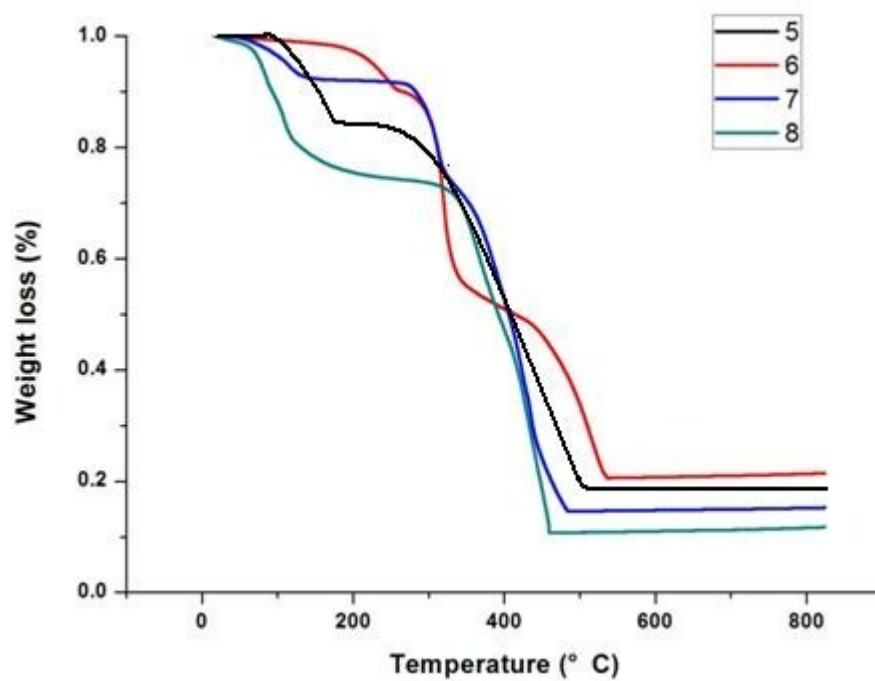

**Figure S4.** The TG curves of complexes **1-8**.

**Table S1.** Selected Bond Lengths (Å) and Bond Angles (deg) for **1-8<sup>a</sup>**.

| Complex 1           |            |                     |            |
|---------------------|------------|---------------------|------------|
| Zn(1)-O(1)#1        | 1.9533(19) | Zn(1)-O(3)#2        | 1.957(2)   |
| Zn(1)-O(2)          | 1.9822(19) | Zn(1)-O(6)          | 1.991(2)   |
| O(1)#1-Zn(1)-O(3)#2 | 132.20(9)  | O(1)#1-Zn(1)-O(2)   | 106.90(9)  |
| O(3)#2-Zn(1)-O(2)   | 98.25(9)   | O(1)#1-Zn(1)-O(6)   | 106.11(10) |
| O(3)#2-Zn(1)-O(6)   | 104.37(10) | O(2)-Zn(1)-O(6)     | 106.88(9)  |
| Complex 2           |            |                     |            |
| Zn(1)-O(6)          | 1.973(3)   | Zn(1)-O(11)         | 2.068(3)   |
| Zn(1)-N(4)          | 2.134(3)   | Zn(1)-O(1)          | 2.141(3)   |
| Zn(1)-N(3)          | 2.157(3)   | Zn(1)-O(2)          | 2.390(3)   |
| Zn(2)-O(4)          | 1.954(3)   | Zn(2)-O(8)#2        | 1.980(3)   |
| Zn(2)-O(12)         | 2.074(3)   | Zn(2)-N(1)          | 2.104(4)   |
| Zn(2)-N(2)          | 2.190(4)   | O(6)-Zn(1)-O(11)    | 100.95(12) |
| O(6)-Zn(1)-N(4)     | 120.22(12) | O(11)-Zn(1)-N(4)    | 93.83(12)  |
| O(6)-Zn(1)-O(1)     | 96.91(11)  | O(11)-Zn(1)-O(1)    | 92.27(12)  |
| N(4)-Zn(1)-O(1)     | 140.28(12) | O(6)-Zn(1)-N(3)     | 90.15(12)  |
| N(4)-Zn(1)-N(3)     | 77.11(13)  | O(11)-Zn(1)-O(2)    | 86.39(11)  |
| O(1)-Zn(1)-O(2)     | 57.27(11)  | O(4)-Zn(2)-O(8)#2   | 128.15(13) |
| O(12)-Zn(2)-N(1)    | 93.73(16)  | O(4)-Zn(2)-N(2)     | 89.23(14)  |
| O(8)#2-Zn(2)-N(2)   | 90.44(14)  | N(1)-Zn(2)-N(2)     | 77.12(17)  |
| Complex 3           |            |                     |            |
| Zn(1)-O(5)#1        | 1.935(2)   | Zn(1)-O(3)          | 1.974(2)   |
| Zn(1)-O(1)          | 2.098(2)   | Zn(1)-N(2)          | 2.112(3)   |
| Zn(1)-N(1)          | 2.199(3)   | O(5)#1-Zn(1)-O(3)   | 125.80(10) |
| O(5)#1-Zn(1)-O(1)   | 101.74(9)  | O(3)-Zn(1)-O(1)     | 89.55(9)   |
| O(5)#1-Zn(1)-N(2)   | 121.96(10) | O(3)-Zn(1)-N(2)     | 110.38(10) |
| O(1)-Zn(1)-N(2)     | 91.27(10)  | O(5)#1-Zn(1)-N(1)   | 89.85(10)  |
| Complex 4           |            |                     |            |
| Zn(1)-O(4)#1        | 1.976(3)   | Zn(1)-O(2)          | 2.001(3)   |
| Zn(1)-O(1)#2        | 2.008(3)   | Zn(1)-N(2)          | 2.082(4)   |
| O(4)#1-Zn(1)-O(2)   | 100.28(14) | O(4)#1-Zn(1)-O(1)#2 | 104.53(14) |
| O(2)-Zn(1)-O(1)#2   | 95.67(13)  | O(4)#1-Zn(1)-N(2)   | 130.50(15) |
| O(2)-Zn(1)-N(2)     | 112.14(14) | O(1)#2-Zn(1)-N(2)   | 108.15(14) |
| Complex 5           |            |                     |            |
| Cu(1)-O(3)          | 1.943(2)   | Cu(1)-O(5)          | 1.954(3)   |
| Cu(1)-O(1)          | 1.978(2)   | Cu(1)-O(4)          | 1.979(3)   |
| Cu(1)-O(2)          | 2.163(3)   | O(3)-Cu(1)-O(1)     | 88.79(11)  |
| O(5)-Cu(1)-O(1)     | 90.56(11)  | O(3)-Cu(1)-O(4)     | 88.08(11)  |
| O(5)-Cu(1)-O(4)     | 90.23(11)  | O(1)-Cu(1)-O(4)     | 168.01(8)  |
| O(3)-Cu(1)-O(2)     | 96.20(11)  | O(5)-Cu(1)-O(2)     | 95.21(10)  |
| O(1)-Cu(1)-O(2)     | 95.62(11)  | O(4)-Cu(1)-O(2)     | 96.22(11)  |



| Complex 6           |            |                     |            |
|---------------------|------------|---------------------|------------|
| Cu(1)-O(1)          | 1.9503(19) | Cu(1)-O(1)#1        | 1.9503(19) |
| Cu(1)-N(3)#1        | 1.992(2)   | Cu(1)-N(3)          | 1.992(2)   |
| Cu(2)-O(3)#2        | 1.9463(19) | Cu(2)-O(2)          | 1.9627(19) |
| Cu(2)-N(2)          | 2.010(2)   | Cu(2)-N(1)          | 2.023(2)   |
| Cu(2)-O(5)          | 2.386(3)   | N(3)#1-Cu(1)-N(3)   | 82.33(13)  |
| O(1)-Cu(1)-O(1)#1   | 95.32(11)  | O(1)-Cu(1)-N(3)#1   | 171.54(9)  |
| O(1)#1-Cu(1)-N(3)#1 | 91.44(9)   | O(1)-Cu(1)-N(3)     | 91.44(9)   |
| O(1)#1-Cu(1)-N(3)   | 171.54(9)  | O(3)#2-Cu(2)-O(2)   | 98.46(8)   |
| O(3)#2-Cu(2)-N(2)   | 171.46(9)  | O(2)-Cu(2)-N(2)     | 88.76(9)   |
| O(3)#2-Cu(2)-N(1)   | 90.59(9)   | O(2)-Cu(2)-N(1)     | 167.15(10) |
| N(2)-Cu(2)-N(1)     | 81.58(10)  | O(3)#2-Cu(2)-O(5)   | 92.95(12)  |
| Complex 7           |            |                     |            |
| Co(1)-O(2)          | 2.033(3)   | Co(1)-N(3)#1        | 2.107(3)   |
| Co(1)-N(2)          | 2.160(4)   | Co(1)-O(5)#2        | 2.166(4)   |
| Co(1)-O(1)          | 2.197(3)   | Co(1)-O(4)#2        | 2.288(3)   |
| O(2)-Co(1)-N(3)#1   | 126.53(13) | O(2)-Co(1)-N(2)     | 93.26(13)  |
| N(3)#1-Co(1)-N(2)   | 96.89(13)  | O(2)-Co(1)-O(5)#2   | 141.48(11) |
| N(3)#1-Co(1)-O(5)#2 | 89.59(11)  | N(2)-Co(1)-O(5)#2   | 95.17(12)  |
| O(2)-Co(1)-O(1)     | 81.99(13)  | N(3)#1-Co(1)-O(1)   | 85.12(13)  |
| N(2)-Co(1)-O(1)     | 175.11(13) | N(3)#1-Co(1)-O(4)#2 | 147.86(12) |
| Complex 8           |            |                     |            |
| Co(1)-O(3)#1        | 2.0516(10) | Co(1)-O(1)          | 2.0653(9)  |
| Co(1)-O(6)          | 2.1014(11) | Co(1)-N(2)          | 2.1471(12) |
| Co(1)-N(1)          | 2.1526(11) | Co(1)-O(7)          | 2.1536(10) |
| O(3)#1-Co(1)-O(1)   | 92.30(4)   | O(3)#1-Co(1)-O(6)   | 177.18(3)  |
| O(1)-Co(1)-O(6)     | 90.49(4)   | O(3)#1-Co(1)-N(2)   | 85.09(4)   |
| O(1)-Co(1)-N(2)     | 93.03(4)   | O(6)-Co(1)-N(2)     | 95.17(4)   |
| O(3)#1-Co(1)-N(1)   | 87.69(4)   | O(1)-Co(1)-N(1)     | 170.43(3)  |
| O(6)-Co(1)-N(1)     | 89.63(4)   | N(2)-Co(1)-N(1)     | 77.43(4)   |

<sup>a</sup> Symmetry transformations used to generate equivalent atoms: complex 1: #1 -x+2,-y+3,-z+2; #2 -x+2,-y+2,-z+2; complex 2: #1 -x,y+1/2,-z+3/2; #2 -x,y-1/2,-z+3/2. complex 3: #1 -x+1,y-1/2,-z+1/2. Complex 4: #1 x,-y+1,z-1/2; #2 -x+1/2,y-1/2,-z+1/2. Complex 6: #1 -x,y,-z+1/2; #2 -x+1/2,y-1/2,-z+1/2; Complex 7: #1 x+1,y,z, #2 x,y-1,z. Complex 8: #1 x,-y+1/2,z-1/2, #2 x,-y+1/2,z+1/2.
